# Supplementary material for: Probing surface site heterogeneity through 1D and INADEQUATE 31P solid state NMR spectroscopy of silica supported PMe3-Au(I) adducts
Source: Royal Society of Chemistry journal article supplement (doi:10.1039/c0sc00579g), 2011-01-01
Supplement: c0sc00579g.pdf [file c0sc00579g.pdf]

## Supporting Information

### Probing the Surface Heterogeneity of Silica by 1D and INADEQUATE <sup>31</sup>P NMR Solid State NMR Spectroscopy of PMe<sub>3</sub>-Au(I) adducts

David Gajan,<sup>a,b</sup> Daniel Levine,<sup>a</sup> Eva Zocher,<sup>a</sup> Christophe Copéret,<sup>a,\*</sup> Anne Lesage,<sup>b</sup>  
Lyndon Emsley.<sup>b,\*</sup>

<sup>a</sup> *Université de Lyon, Institut de Chimie de Lyon, C2P2-LCOMS UMR 5265 (CNRS – CPE – Université Lyon 1), ESCPE Lyon, 43, Bd. du 11 Novembre F-69616 Villeurbanne, France. E-mail: coperet@cpe.fr;*

<sup>b</sup> *Université de Lyon, CNRS/ENS-Lyon/UCB-Lyon 1, Centre de RMN à Très Hauts Champs, 5 rue de la Doua, 69100 Villeurbanne, France. E-mail: lyndon-emsley@ens-lyon.fr*

**General procedure.** All experiments were carried out under dry and oxygen free Ar using either standard Schlenk or glove-box techniques for organometallic synthesis. For the syntheses and the treatments of the surface species, reactions were carried out using high vacuum lines ( $10^{-5}$  mbar) and glove-box techniques. Silica (Aerosil, 200 m<sup>2</sup>.g<sup>-1</sup>) was compacted with distilled water, calcined at 500 °C under air for 2 h and treated under vacuum ( $10^{-5}$  mbar) at 500 °C for 12 h and then at 700 °C for 4 h to give SiO<sub>2-(700)</sub>. Pentane was distilled from NaK under N<sub>2</sub>. (Me<sub>3</sub>Si)<sub>2</sub>NAuPMe<sub>3</sub> was prepared according to literature procedures.<sup>1</sup> Elemental analyses were performed at Mikroanalytisches Labor Pascher.

**Direct reflectance infrared Fourier transform spectroscopy (DRIFT).** DRIFT spectra were recorded on a Thermo Electron Corporation Nicolet F6700 apparatus. Typically, 64 scans were accumulated for each spectrum (resolution 2 cm<sup>-1</sup>). The reflectance measurements were refined according to the Kubelka-Munk theory for enhanced resolution.

**Solid State Nuclear Magnetic Resonance Spectroscopy.** All spectra were recorded on a Bruker AVANCE spectrometer operating at <sup>1</sup>H, <sup>13</sup>C and <sup>31</sup>P Larmor frequencies of 500.13, 125.76 and 202.47 MHz, respectively. The samples were introduced in a zirconia rotor in the glove box and tightly closed. Chemical shifts are reported in ppm downfield from liquid

SiMe<sub>4</sub> (0 ppm) for <sup>1</sup>H and <sup>13</sup>C NMR, and from Na<sub>2</sub>HPO<sub>4</sub>·2H<sub>2</sub>O (6.6 ppm) for <sup>31</sup>P spectra, respectively. Spectra were obtained using a 4 mm MAS double resonance (X-<sup>1</sup>H) probe at a spinning frequency of 10 kHz. 1D refocused zfr-INADEQUATE spectra<sup>2</sup> were obtained using a 4 mm MAS double resonance (<sup>31</sup>P-<sup>1</sup>H) probe at a spinning frequency of 12.5 kHz (the length of the echo period (tau-pi-tau) was experimentally optimized). The proton 90° pulse was 2.5 μs. Ramped cross-polarization<sup>3</sup> using a contact time of 5 ms was used to transfer the magnetization from protons to phosphorus. SPINAL-64 proton decoupling<sup>4</sup> was applied during evolution and acquisition periods at a RF field of 100 kHz. Carbon 90° and 180° pulse lengths of 2.5 and 5 μs, respectively, were used. Unless otherwise stated, the τ delay was set to 3 ms. The time of double quantum coherence evolution was 3 μs. The recycle delay was 2 s.

**Preparation of {Au(PMe<sub>3</sub>)/SiO<sub>2</sub>}<sub>X</sub> (X = 0.5, 0.75, 1 and 2) by impregnation of X equiv. of (Me<sub>3</sub>Si)<sub>2</sub>NAuPMe<sub>3</sub> onto SiO<sub>2-(700)</sub>.**

**Representative procedure.** A mixture of (Me<sub>3</sub>Si)<sub>2</sub>NAuPMe<sub>3</sub> (120 mg, 0.27 mmol, 2.1 equiv.) and SiO<sub>2-(700)</sub> (510 mg, 0.13 mmol SiOH) in pentane (8 mL) was stirred at 25 °C for 3 h. The reaction mixture was filtered-off. The solid washed three times with pentane (8 mL), and finally dried under vacuum (10<sup>-5</sup> mbar) at 25 °C for 1 h to yield {Au(PMe<sub>3</sub>)/SiO<sub>2</sub>}<sub>2</sub>.

**Reaction of {Au(PMe<sub>3</sub>)/SiO<sub>2</sub>}<sub>X</sub> with PMe<sub>3</sub>. Representative procedure for {Au(PMe<sub>3</sub>)/SiO<sub>2</sub>}<sub>1.0</sub>.** (140 mg, 21 μmol) was contacted with an excess of PMe<sub>3</sub> under vapor pressure at 25 °C for 1 h. The sample was treated 8 h under vacuum (10<sup>-6</sup> mbar) at 25 °C and stored in the glove box.

1. A. Bauer, W. Schneider, K. Angermaier, A. Schier and H. Schmidbaur, *Inorg. Chim. Acta*, 1996, **251**, 249-253.
2. S. Cadars, J. Sein, L. Duma, A. Lesage, T. N. Pham, J. H. Baltisberger, S. P. Brown and L. Emsley, *J. Magn. Reson.*, 2007, **188**, 24-34.
3. G. Metz, X. L. Wu and S. O. Smith, *J. Magn. Reson. Ser. A*, 1994, **110**, 219-227.
4. B. M. Fung, A. K. Khitrin and K. Ermolaev, *J. Magn. Reson.*, 2000, **142**, 97-101.
